# Supplementary material
Source: PubMed Central journal article supplement (PMC4492239)
Supplement: supp_the2015-0135_Peters-15-135.pdf [file supp_the2015-0135_Peters-15-135.pdf]

## Overview

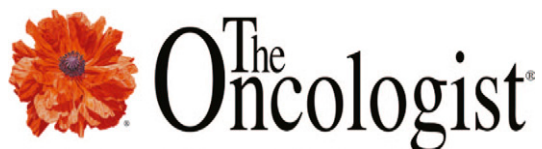

The official journal of the Society for Translational Oncology

**First Published Online May 29, 2015**

**DOI:** 10.1634/theoncologist.2015-0135

**Title:** Phase II Trial of Upfront Bevacizumab, Irinotecan, and Temozolomide for Unresectable Glioblastoma

**Authors:** Katherine B. Peters,<sup>a</sup> Emil Lou,<sup>b</sup> Annick Desjardins,<sup>a</sup> David A. Reardon,<sup>c</sup> Eric S. Lipp,<sup>a</sup> Elizabeth Miller,<sup>a</sup> James E. Herndon II,<sup>a</sup> Frances McSherry,<sup>a</sup> Henry S. Friedman,<sup>a</sup> James J. Vredenburgh<sup>d</sup>

<sup>a</sup>Duke University Medical Center, Durham, North Carolina, USA; <sup>b</sup>University of Minnesota, Minneapolis, Minnesota, USA; <sup>c</sup>Dana-Farber Cancer Institute, Boston, Massachusetts, USA; <sup>d</sup>St. Francis Medical Cancer Center, Hartford, Connecticut, USA

**ClinicalTrials.gov Identifier:** NCT00979017

**Sponsor(s):** Genentech, Inc.

**Principal Investigator:** Katherine B. Peters

**IRB Approved:** Yes

### Disclosures

**Annick Desjardins:** Genentech USA, Inc., EMD Serono, Inc., Celldex Therapeutics, Cavion LLC (C/A), Genentech USA, Inc., EMD Soreno, Inc., Exelixis, Inc., Tactical Therapeutics, Novartis, Triphase Accelerator (RF), letters of patent for “Oncolytic poliovirus for human tumors” (IP); **David A. Reardon:** Merck, Genentech, Novartis, Stemline, Midatech, Regeneron, Novocure, Abbvie, Amgen (C/A), Incyte, Celldex (RF), Genentech/Roche, Merck, Novocure (H); **Henry S. Friedman:** Genentech/Roche (C/A, RF, H). The other authors indicated no financial relationships.

(C/A) Consulting/advisory relationship; (RF) Research funding; (E) Employment; (ET) Expert testimony; (H) Honoraria received; (OI) Ownership interests; (IP) Intellectual property rights/inventor/patent holder; (SAB) Scientific advisory board

## Lessons Learned

- Trials focusing on unresectable multifocal glioblastoma are needed because of the extremely poor prognosis and challenges in receiving standard therapy, such as concurrent radiation and chemotherapy.
- Developing a strategy to chemically debulk tumors before radiation and/or surgery is warranted.

## Author Summary: Abstract and Brief Discussion

### Background

Extent of resection remains a key prognostic factor in glioblastoma (GBM), with gross total resection providing a better prognosis than biopsy or subtotal resection. We conducted a phase II trial of upfront therapy with bevacizumab (BV), irinotecan (CPT-11), and temozolomide (TMZ) prior to chemoradiation in patients with unresectable, subtotally resected, and/or multifocal GBM.

### Methods

Patients received up to 4 cycles of TMZ at 200 mg/m<sup>2</sup> per day on days 1–5 (standard dosing) and BV at 10 mg/kg every 2 weeks on a 28-day cycle. CPT-11 was given every 2 weeks on a 28-day cycle at 125 mg/m<sup>2</sup> or 340 mg/m<sup>2</sup> depending on antiepileptic drugs. Magnetic resonance imaging of the brain was done every 4 weeks, and treatment continued as long as there was no tumor progression or unmanageable toxicity. The primary endpoint was tumor response rate, with a goal of 26% or greater.

## Results

Forty-one patients were enrolled from December 2009 to November 2010. Radiographic responses were as follows: 9 patients (22.0%) had partial response, 25 (61.0%) had stable disease, and 2 (4.9%) had progression; 5 patients were not assessed. Cumulative response rate was 22%. Median overall survival was 12 months (95% confidence interval: 7.2–13.5 months).

## Conclusion

Upfront treatment with BV, TMZ, and CPT-11 is tolerable and can lead to radiographic response in unresectable and/or subtotally resected GBM.

## Discussion

Standard treatment approaches for GBM result in median survival rates of between 8 and 16 months. Patients who have subtotal resection have a worse prognosis than patients who have gross total resection and an even worse prognosis than patients with unresectable/multifocal disease. In this phase II single-arm, single institution study (Duke University institutional review board approval Pro00019065; ClinicalTrials.gov identifier NCT00979017), we evaluated the response rate of upfront TMZ, CPT-11, and BV in newly diagnosed unresectable GBM patients prior to standard chemoradiation. Secondary outcomes included safety and efficacy. Forty-one GBM patients were enrolled. The treatment plan prior to standard chemoradiation included four 28-day cycles of TMZ 200 mg/m<sup>2</sup> (days 1–5), BV 10 mg/kg, and CPT-11 125 mg/m<sup>2</sup> for patients taking a non-enzyme-inducing antiepileptic drug, or no antiepileptic drug (AED); CPT-11 dose was increased to 340 mg/m<sup>2</sup> for patients on an enzyme-inducing AED (on days 1 and 15). Brain magnetic resonance imaging was done every 4 weeks, with results interpreted according to published Response Assessment in Neuro-Oncology criteria. Patients were regularly monitored for treatment-related toxicities and disease-related morbidity.

The surgical extent for the study population was biopsy in 70.7% and subtotal resection in 29.3%. Most patients (70.7%) had only a biopsy, and 7 patients (17.1%) had multifocal disease. Fourteen patients completed all four planned cycles without tumor progression while on protocol. Thirty-six patients were evaluated for objective tumor response (Table 1). There were no complete responses and 9 partial responses, for an overall response rate of 22% (95% confidence interval [CI]: 12%–37%). Median follow-up for all patients was 41.7 months (95% CI: 32.3–46.1 months). Median overall survival was 12 months (95% CI: 7.2–13.5 months), and median progression-free survival was 8.6 months (95% CI: 3.5–11.3 months).

This multimodality approach to upfront treatment of patients with unresectable GBM consisting of the addition of anti-VEGF therapy with BV to TMZ and CPT-11 can provide disease control prior to radiotherapy. This combination regimen was tolerable, with no unexpected toxicities.

## Trial Information

|                                                        |                                                                                                                                                                                                                                                                                                                                         |
|--------------------------------------------------------|-----------------------------------------------------------------------------------------------------------------------------------------------------------------------------------------------------------------------------------------------------------------------------------------------------------------------------------------|
| <b>Disease</b>                                         | Brain cancer - primary                                                                                                                                                                                                                                                                                                                  |
| <b>Stage of disease / treatment</b>                    | Neoadjuvant                                                                                                                                                                                                                                                                                                                             |
| <b>Prior Therapy</b>                                   | None                                                                                                                                                                                                                                                                                                                                    |
| <b>Type of study - 1</b>                               | Phase II                                                                                                                                                                                                                                                                                                                                |
| <b>Type of study - 2</b>                               | Single Arm                                                                                                                                                                                                                                                                                                                              |
| <b>Primary Endpoint</b>                                | Overall Response Rate                                                                                                                                                                                                                                                                                                                   |
| <b>Secondary Endpoints</b>                             | Toxicity<br>Progression-free Survival<br>Overall Survival<br>Incidence and Severity of CNS Hemorrhage and Systemic Hemorrhage                                                                                                                                                                                                           |
| <b>Additional Details of Endpoints or Study Design</b> | For the primary endpoint, response rate for temozolomide alone was 42%, with a 95% CI of 26%–59%. If the true response rate with the combination upfront therapy was 26% or greater, then there would be interest in formally incorporating bevacizumab, irinotecan, and temozolomide upfront for the treatment of newly diagnosed GBM. |
| <b>Investigator's Analysis</b>                         | Some activity but insufficient for further development                                                                                                                                                                                                                                                                                  |

## Drug Information

### Drug 1

Generic/Working name

Bevacizumab

Trade name

Avastin

Company name

Genentech

Drug type

Antibody

Drug class

Angiogenesis - VEGF

Dose

10 mg/kg

Route

IV

Schedule of Administration

Days 1 and 15 in 28-day cycle × 4 cycles

### Drug 2

Generic/Working name

Irinotecan

Drug type

Chemotherapy

Drug class

Topoisomerase I

Dose

See Schedule of Administration

Route

Intravenous

Schedule of Administration

Given intravenously on days 1 and 15 at 125 mg/m<sup>2</sup> for patients on no antiepileptic or non-enzyme-inducing antiepileptics or 340 mg/m<sup>2</sup> for patients on enzyme-inducing antiepileptics on a 28-day cycle for 4 cycles

### Drug 3

Generic/Working name

Temozolomide

Trade name

Temodar

Company name

Merck

Drug type

Chemotherapy

Drug class

Alkylating agent

Dose

200 mg/m<sup>2</sup>

Route

Oral (po)

Schedule of Administration

Days 1–5 in 28-day cycle × 4 cycles

## Patient Characteristics

Number of patients, male

18

Number of patients, female

23

Stage

Not applicable to primary brain tumors

Age

Mean (SD): 58 (10.2)

Number of prior systemic therapies

None

Performance Status

ECOG  
• 0 – 2  
• 1 – 29  
• 2 – 10  
• 3 – 0  
• Unknown – 0

Cancer Types or Histologic Subtypes

Glioblastoma 41

## Primary Assessment Method

### Control Arm: Glioblastoma

Number of patients screened

8

Number of patients enrolled

41

Number of patients evaluable for toxicity

41

|                                                  |                                              |
|--------------------------------------------------|----------------------------------------------|
| <b>Number of patients evaluated for efficacy</b> | 36                                           |
| <b>Evaluation method</b>                         | Response Assessment in Neuro-Oncology (RANO) |
| <b>Response assessment CR</b>                    | <i>n</i> = 0 (0%)                            |
| <b>Response assessment PR</b>                    | <i>n</i> = 9 (22%)                           |
| <b>Response assessment SD</b>                    | <i>n</i> = 25 (61%)                          |
| <b>Response assessment PD</b>                    | <i>n</i> = 2 (4.9%)                          |
| <b>Response assessment OTHER</b>                 | <i>n</i> = 5 (12.1%)                         |
| <b>(Median) duration assessments PFS</b>         | 8.6 months                                   |
| <b>(Median) duration assessments OS</b>          | 12 months                                    |

## Adverse Events Adverse Events At All Dose Levels, Cycle 1

| Name                                                                                                     | *NC/NA | 1  | 2  | 3   | 4   | 5  | All Grades |
|----------------------------------------------------------------------------------------------------------|--------|----|----|-----|-----|----|------------|
| Hemoglobin                                                                                               | 98%    | 0% | 0% | 0%  | 2%  | 0% | 2%         |
| Blood/Bone Marrow - Febrile Pancytopenia                                                                 | 98%    | 0% | 0% | 0%  | 2%  | 0% | 2%         |
| Leukocytes (total WBC)                                                                                   | 91%    | 0% | 0% | 2%  | 7%  | 0% | 9%         |
| Neutrophils/granulocytes (ANC/AGC)                                                                       | 91%    | 0% | 0% | 7%  | 2%  | 0% | 9%         |
| Platelets                                                                                                | 66%    | 0% | 0% | 17% | 17% | 0% | 34%        |
| Fatigue (asthenia, lethargy, malaise)                                                                    | 93%    | 0% | 0% | 7%  | 0%  | 0% | 7%         |
| Death not associated with CTCAE term                                                                     | 93%    | 0% | 0% | 0%  | 0%  | 7% | 7%         |
| Rash/desquamation                                                                                        | 98%    | 0% | 0% | 2%  | 0%  | 0% | 2%         |
| Rash: erythema multiforme (e.g., Stevens-Johnson syndrome, toxic epidermal necrolysis)                   | 98%    | 0% | 0% | 0%  | 2%  | 0% | 2%         |
| Colitis                                                                                                  | 98%    | 0% | 0% | 0%  | 2%  | 0% | 2%         |
| Hemorrhage, CNS                                                                                          | 98%    | 0% | 0% | 2%  | 0%  | 0% | 2%         |
| Hemorrhage, GI                                                                                           | 98%    | 0% | 0% | 2%  | 0%  | 0% | 2%         |
| Hemorrhage/Bleeding - Upper GI NOS                                                                       | 98%    | 0% | 0% | 2%  | 0%  | 0% | 2%         |
| Infection (documented clinically or microbiologically) with Grade 3 or 4 neutrophils (ANC <1.0 × 10e9/L) | 96%    | 0% | 2% | 0%  | 2%  | 0% | 4%         |
| Infection with normal ANC or Grade 1 or 2 neutrophils                                                    | 90%    | 0% | 0% | 10% | 0%  | 0% | 10%        |
| AST, SGOT(serum glutamic oxaloacetic transaminase)                                                       | 98%    | 0% | 0% | 2%  | 0%  | 0% | 2%         |
| Potassium, serum-low (hypokalemia)                                                                       | 96%    | 0% | 0% | 2%  | 2%  | 0% | 4%         |
| Proteinuria                                                                                              | 98%    | 0% | 0% | 2%  | 0%  | 0% | 2%         |
| Sodium, serum-low (hyponatremia)                                                                         | 93%    | 0% | 0% | 7%  | 0%  | 0% | 7%         |
| Confusion                                                                                                | 98%    | 0% | 0% | 2%  | 0%  | 0% | 2%         |
| Seizure                                                                                                  | 88%    | 0% | 0% | 7%  | 5%  | 0% | 12%        |
| Thrombosis/thrombus/embolism                                                                             | 81%    | 0% | 0% | 2%  | 17% | 0% | 19%        |
| Hemorrhage, GU                                                                                           | 98%    | 0% | 0% | 2%  | 0%  | 0% | 2%         |

Adverse Events Legend

Toxicity summary of all adverse events (all attributions).

\*No Change from Baseline/No Adverse Event

## Assessment, Analysis, and Discussion

|                                            |                                                        |
|--------------------------------------------|--------------------------------------------------------|
| <b>Completion</b>                          | Study completed                                        |
| <b>Pharmacokinetics / Pharmacodynamics</b> | Not Collected                                          |
| <b>Investigator's Assessment</b>           | Some activity but insufficient for further development |

### Discussion

Although patients with GBM who have gross total resection achieve the best rates of OS, patients with suboptimal surgery and those for whom surgery is not possible at all have a worse prognosis [1–5]. Treatment regimens are needed that are

tailored to this poorly performing group. Upfront chemotherapy prior to or in lieu of radiation therapy has been used in neuro-oncology whether as a primary treatment or to chemically reduce the area before surgical intervention or radiation therapy [6–15]. The primary endpoint for our current study was to identify whether a significant radiographic response could be achieved in patients with an unresectable and/or subtotally resected tumor. In our study, an overall response rate of 22% was found. Previous studies using preirradiation chemotherapy regimens have been studied, and response rates have ranged from 13% to 54% and included the use of agents such as temozolomide (TMZ), carmustine with cisplatin, and carboplatin with etoposide [7–12]. Specific to our study, we enrolled only patients with multifocal and/or unresectable GBM, representing a subgroup of GBM with poorer prognosis. Response rate was 22%, and this met our criterion of an improvement exceeding 10%. Unfortunately, this did not reach our projected response rate of 26%. We have previously published a similar response rate in this population using an upfront regimen of 4 cycles of TMZ and bevacizumab (BV) at 24.4% [14]. Consequently, we concluded that this regimen of upfront therapy could provide radiographic disease control and stabilization before the initiation of radiotherapy for some patients, but our primary endpoint was not met.

Examining the subset of patients with unresectable disease, an additional important finding from the current study is that that upfront therapy with TMZ, BV, and irinotecan prolongs progression-free survival (PFS) of GBM patients. The median PFS of 8.6 months (95% confidence interval [CI]: 3.5–11.3 months) in our current study is an improvement on our prior findings of 3.1 months (95% CI: 1.4–8.7 months) in patients treated with TMZ and irinotecan without BV [16]. However, comparison of median overall survival (OS) outcomes of these two studies did not correlate with the PFS findings because the addition of BV to TMZ and irinotecan showed a worse outcome, with median OS of 12 months (95% CI: 7.2–13.5 months) in the current study versus median OS of 13.8 months (95% CI: 8.6–16.8 months) for TMZ and irinotecan alone [16]. Compared with our previous study with upfront TMZ and BV in a similar population, median OS was very similar. In this case, the addition of irinotecan resulted in OS of 12 months (95% CI: 7.2–13.5 months) versus 11.7 months (95% CI: 7.4–15.6 months) without irinotecan [14]. However, all three upfront combinations provided a substantial benefit for both PFS and OS compared with the subanalysis of similar unresectable, biopsy-only patients in prior studies (7.9 months for radiation alone and 9.4 months for chemoradiation in unresectable patients) [5]. A primary limitation of this current study and our two previous studies is that the sample size is quite small, so it will be challenging to compare these differences as significant.

A major limitation of the current study is that analysis of methylation of methyl guanine methyl transferase (MGMT) promoter was not obtained for all patients. In patients who underwent biopsy only, the amount of tumor tissue obtained was sometimes a limiting factor. To properly compare our results to our previous studies with upfront chemotherapy and to the historical Stupp regimen data, MGMT promoter methylation status should be determined. Moreover, compelling data from the multicenter GLARIUS study suggest that use of bevacizumab with irinotecan during radiotherapy is particularly beneficial to GBM patients that have nonmethylated MGMT promoter [17].

In conclusion, our multimodality approach to upfront treatment of patients with unresectable GBM consisting of the addition of anti-VEGF therapy with BV to TMZ and irinotecan can provide disease control prior to radiotherapy. Although we did not meet the endpoint for the trial, some partial responses to therapy were seen. Use of agents such as bevacizumab to control edema during radiation should be explored in this difficult-to-treat population. This combination regimen was tolerable with no unexpected toxicities.

## Acknowledgments

We thank Wendy Gentry and Kelly Seagroves for assisting with preparation of the manuscript and Michael Franklin, M.S., for editorial support.

## References

1. Jeremic B, Grujicic D, Antunovic V et al. Influence of extent of surgery and tumor location on treatment outcome of patients with glioblastoma multiforme treated with combined modality approach. *J Neurooncol* 1994;21:177–185.
2. McGirt MJ, Chaichana KL, Gathinji M et al. Independent association of extent of resection with survival in patients with malignant brain astrocytoma. *J Neurosurg* 2009;110:156–162.
3. Nitta T, Sato K. Prognostic implications of the extent of surgical resection in patients with intracranial malignant gliomas. *Cancer* 1995;75:2727–2731.
4. Quigley MR, Flores N, Maroon JC et al. Value of surgical intervention in the treatment of glioma. *Stereotact Funct Neurosurg* 1995;65:171–175.
5. Stupp R, Hegi ME, Mason WP et al. Effects of radiotherapy with concomitant and adjuvant temozolomide versus radiotherapy alone on survival in glioblastoma in a randomised phase III study: 5-year analysis of the EORTC-NCIC trial. *Lancet Oncol* 2009;10:459–466.

6. Bihan C, Foscolo S, Boone M et al. Upfront bevacizumab and temozolomide or fotemustine before radiotherapy for patients with glioblastoma and severe neurological impairment at diagnosis. *Case Rep Oncol* 2012;5:530–536.
7. Dazzi C, Cariello A, Giannini M et al. A sequential chemo-radiotherapeutic treatment for patients with malignant gliomas: A phase II pilot study. *Anticancer Res* 2000;20:515–518.
8. Dropcho EJ, Rosenfeld SS, Morawetz RB et al. Preradiation intracarotid cisplatin treatment of newly diagnosed anaplastic gliomas. The CNS Cancer Consortium. *J Clin Oncol* 1992;10:452–458.
9. Gilbert M, O'Neill A, Grossman S et al. A phase II study of preradiation chemotherapy followed by external beam radiotherapy for the treatment of patients with newly diagnosed glioblastoma multiforme: An Eastern Cooperative Oncology Group study (E2393). *J Neurooncol* 2000;47:145–152.
10. Gilbert MR, Friedman HS, Kuttesch JF et al. A phase II study of temozolomide in patients with newly diagnosed supratentorial malignant glioma before radiation therapy. *Neuro Oncol* 2002;4:261–267.
11. Jeremic B, Shibamoto Y, Grujicic D et al. Pre-irradiation carboplatin and etoposide and accelerated hyperfractionated radiation therapy in patients with high-grade astrocytomas: A phase II study. *Radiother Oncol* 1999;51:27–33.
12. Kirby S, Macdonald D, Fisher B et al. Pre-radiation chemotherapy for malignant glioma in adults. *Can J Neurol Sci* 1996;23:123–127.
13. Laigle-Donadey F, Figarella-Branger D, Chinot O et al. Up-front temozolomide in elderly patients with glioblastoma. *J Neurooncol* 2010;99: 89–94.
14. Lou E, Peters KB, Sumrall AL et al. Phase II trial of upfront bevacizumab and temozolomide for unresectable or multifocal glioblastoma. *Cancer Med* 2013;2:185–195.
15. Quinn JA, Reardon DA, Friedman AH et al. Phase II trial of temozolomide in patients with progressive low-grade glioma. *J Clin Oncol* 2003;21: 646–651.
16. Quinn JA, Jiang SX, Reardon DA et al. Phase II trial of temozolomide (TMZ) plus irinotecan (CPT-11) in adults with newly diagnosed glioblastoma multiforme before radiotherapy. *J Neurooncol* 2009;95:393–400.
17. Herrlinger U, Schaefer N, Steinbach JP et al. Bevacizumab, irinotecan, and radiotherapy versus standard temozolomide and radiotherapy in newly diagnosed, MGMT-nonmethylated glioblastoma patients: First results from the randomized multicenter GLARIUS trial. Presented at: American Society of Clinical Oncology annual meeting; May 31–June 4, 2013; Chicago, IL.

## Figures and Tables

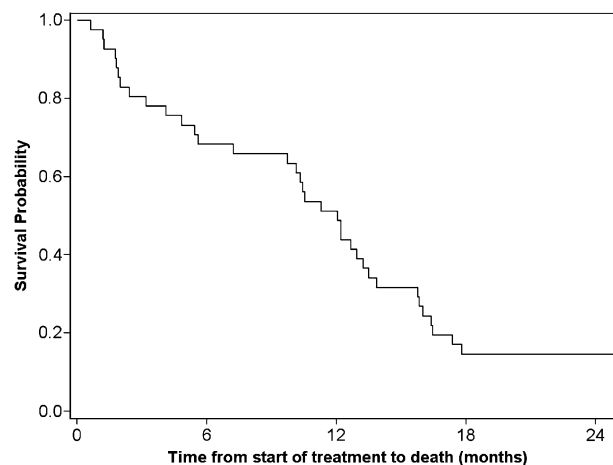

**Figure 1.** Kaplan-Meier plot for overall survival.

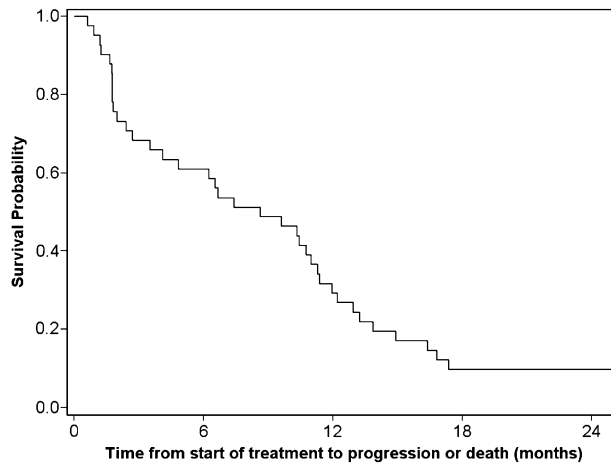

**Figure 2.** Kaplan-Meier plot for progression-free survival.

**Table 1.** Patient and clinical demographic characteristics

| Characteristics                            | Results   |
|--------------------------------------------|-----------|
| Total patients, <i>N</i>                   | 41        |
| Age, years, mean (SD)                      | 58 (10.2) |
| Sex, <i>n</i> (%)                          |           |
| Male                                       | 18 (43.9) |
| Female                                     | 23 (56.1) |
| Karnofsky performance status, <i>n</i> (%) |           |
| 100                                        | 2 (4.9)   |
| 90                                         | 12 (29.3) |
| 80                                         | 17 (41.5) |
| 70                                         | 10 (24.4) |
| Surgery, <i>n</i> (%)                      |           |
| Biopsy only                                | 29 (70.7) |
| Subtotal resection                         | 12 (29.3) |
| Extent of disease, <i>n</i> (%)            |           |
| Unifocal                                   | 34 (82.9) |
| Multifocal                                 | 7 (17.1)  |

**Table 2.** Overall best response as determined by the Response Assessment in Neuro-Oncology criteria

| Response            | Patients, <i>n</i> | %    |
|---------------------|--------------------|------|
| Partial response    | 9                  | 22.0 |
| Stable disease      | 25                 | 61.0 |
| Progressive disease | 2                  | 4.9  |
| Not assessed        | 5                  | 12.1 |

**Table 3.** Survival estimates, reported as median time to survival from time of enrollment in trial until death or progression (*n* = 41)

| <b>Variable</b>               | <b>Overall survival</b> | <b>Progression-free survival</b> |
|-------------------------------|-------------------------|----------------------------------|
| Total patients, <i>N</i>      | 41                      | 41                               |
| Failed, <i>n</i>              | 36                      | 38                               |
| Median in months (95% CI)     | 12 (7.2–13.5)           | 8.6 (3.5–11.3)                   |
| 6-month estimate, % (95% CI)  | 68.3 (51.7–80.2)        | 61.0 (44.4–74.0)                 |
| 12-month estimate, % (95% CI) | 51.2 (35.1–65.2)        | 29.3 (16.4–43.4)                 |
| 24-month estimate, % (95% CI) | 14.6 (5.9–27)           | 9.8 (3.1–21)                     |

Abbreviation: CI, confidence interval.

**Table 4.** Grade 3 and 4 adverse events related to treatment regimen of upfront bevacizumab, temozolomide, and irinotecan

| <b>Toxicity</b>        | <b>Number of events</b> |                |
|------------------------|-------------------------|----------------|
|                        | <b>Grade 3</b>          | <b>Grade 4</b> |
| <b>Hematologic</b>     |                         |                |
| Thrombocytopenia       | 7                       | 5              |
| Neutropenia            | 3                       | 1              |
| Leukopenia             | 1                       | 3              |
| Anemia                 | 0                       | 1              |
| <b>Nonhematologic</b>  |                         |                |
| Venous thromboembolism | 1                       | 7              |
| Pneumonia              | 4                       | 0              |
| Hyponatremia           | 3                       | 0              |
| Fatigue                | 3                       | 0              |
| Gastrointestinal bleed | 2                       | 0              |
| CNS hemorrhage         | 1                       | 0              |
| Colitis                | 0                       | 1              |
| Hematuria              | 1                       | 0              |
| Elevated AST           | 1                       | 0              |
| Hypokalemia            | 1                       | 1              |
| Proteinuria            | 1                       | 0              |

Abbreviations: AST, aspartate aminotransferase; CNS, central nervous system.
